# Supplementary material
Source: publisher figshare collection journal article supplement (https://tandf.figshare.com/ndownloader/files/10076823)
Supplement: Supplementary file 1 [file 10076823]

## Supplemental Tables

**Supplemental Table S1. Effect of Technical Toxaphene and Toxaphene Congeners on Cytotoxicity in Male and Female B6C3F1 Hepatocytes after 24 Hours of Exposure**

|                |      | Cell viability (% control) |        |
|----------------|------|----------------------------|--------|
| Exposure (ppm) |      | Male                       | Female |
| DMSO (%)       | 0.1  | 100.0                      | 100.0  |
|                | 0.25 | 100.0                      | 97.3   |
| TT (µg/ml)     | 1.0  | 94.3                       | 99.9   |
|                | 2.5  | 95.4                       | 98.3   |
|                | 5.0  | 89.8                       | 88.4   |
|                | 10   | 84.2*                      | 74.8*  |
|                | 15   | 70.9*                      | 64.8*  |
|                | 25   | 65.6*                      | 52.1*  |
|                | 50   | 47.8*                      | 12.7*  |
|                | 100  | 6.0*                       | 5.9*   |
| p-26 (µg/ml)   | 1.0  | 103.3                      | 98.7   |
|                | 2.5  | 100.0                      | 98.1   |
|                | 5.0  | 92.5                       | 94.3   |
|                | 10   | 90.4                       | 90.1   |
|                | 15   | 82.2*                      | 78.6*  |
|                | 25   | 78.4*                      | 68.2*  |
|                | 50   | 35.4*                      | 61.8*  |
| p-50 (µg/ml)   | 1.0  | 97.3                       | 100.0  |
|                | 2.5  | 95.1                       | 96.4   |
|                | 5.0  | 95.0                       | 90.1*  |
|                | 10   | 96.4                       | 87.8*  |
|                | 15   | 83.6*                      | 86.2*  |
|                | 25   | 77.9*                      | 81.2*  |
|                | 50   | 44.7*                      | 50.3*  |
| p-62 (µg/ml)   | 1.0  | 101.4                      | 99.7   |
|                | 2.5  | 91.1                       | 91.9   |
|                | 5.0  | 84.8                       | 84.1   |
|                | 10   | 79.2*                      | 75.9*  |
|                | 15   | 75.4*                      | 72.2*  |
|                | 25   | 66.9*                      | 64.6*  |
|                | 50   | 29.3*                      | 47.1*  |
| Hx-Sed (µg/ml) | 1.0  | 102.4                      | 105.3  |
|                | 2.5  | 88.6                       | 95.0   |
|                | 5.0  | 82.0                       | 89.4   |
|                | 10   | 73.6*                      | 87.4*  |
|                | 15   | 68.8*                      | 77.2*  |
|                | 25   | 57.0*                      | 69.7*  |
|                | 50   | 54.3*                      | 62.8*  |
| Hp-Sed (µg/ml) | 1.0  | 98.6                       | 100.0  |
|                | 2.5  | 95.0                       | 90.4   |
|                | 5.0  | 91.8                       | 93.1   |
|                | 10   | 95.5                       | 109.2  |
|                | 15   | 93.5                       | 107.4  |
|                | 25   | 91.1                       | 86.7   |
|                | 50   | 22.7*                      | 49.4*  |

|                      |     | Cell viability (% control) |        |
|----------------------|-----|----------------------------|--------|
| Exposure (ppm)       |     | Male                       | Female |
| Mixture 1<br>(ug/ml) | 0.8 | 90.9                       | 85.0   |
|                      | 2   | 98.8                       | 90.5   |
|                      | 4   | 112.1                      | 81.4   |
|                      | 8   | 113.4                      | 92.9   |
|                      | 20  | 116.1                      | 91.1   |
|                      | 40  | 69.3*                      | 87.4   |
|                      | 80  | 58.9*                      | 92.9   |
| Mixture 2<br>(ug/ml) | 1   | 88.2                       | 92.5   |
|                      | 2.5 | 89.5                       | 80.3   |
|                      | 5   | 83.0                       | 86.5   |
|                      | 10  | 92.6                       | 79.7   |
|                      | 25  | 87.8                       | 94.8   |
|                      | 50  | 58.7*                      | 96.6   |
|                      | 100 | 49.9*                      | 89.8   |

TT=Technical toxaphene.

\*Significantly different from control value at  $p < 0.05$  (one-way ANOVA with Holm-Sidak post hoc).  $n \geq 3$ .

**Supplemental Table S2: Effect of Technical Grade Toxaphene on GJIC in Male and Female B6C3F1 Mouse Hepatocytes**

|               |             | 3-hour         |                                            | 24-hour        |                                            |
|---------------|-------------|----------------|--------------------------------------------|----------------|--------------------------------------------|
|               |             | Dye Coupling % | % of Control "()"= Difference from Control | Dye Coupling % | % of Control "()"= Difference from Control |
| <b>Male</b>   | DMSO (0.1%) | 94.3           | 100.0                                      | 92.0           | 100.0                                      |
|               | PB (2mM)    | 72.8*          | 77.2* (22.8)                               | 86.0           | 93.5 (6.5)                                 |
|               | 0.2 ppm     | 92.2           | 97.7 (2.3)                                 | 88.6           | 96.3 (3.7)                                 |
|               | 1 ppm       | 86.4           | 91.6 (8.4)                                 | 86.3           | 93.8 (6.2)                                 |
|               | 5 ppm       | 77.8*          | 82.5* (17.5)                               | 67.9*          | 73.9* (26.1)                               |
| <b>Female</b> | DMSO (0.1%) | 91.2           | 100.0                                      | 91.8           | 100.0                                      |
|               | PB (2mM)    | 77.5*          | 85.0* (15.0)                               | 87.7           | 95.5 (4.5)                                 |
|               | 0.2 ppm     | 92.4           | 101.3 (-1.3)                               | 89.5           | 97.5 (2.5)                                 |
|               | 1 ppm       | 85.6           | 93.8 (6.2)                                 | 89.2           | 97.2 (2.8)                                 |
|               | 5 ppm       | 76.6*          | 84.1* (15.9)                               | 79.7*          | 86.8* (13.2)                               |

Gap junctional intercellular communication inhibition as measured by the dye coupling in B6C3F1 mouse hepatocytes exposed to non-cytotoxic concentrations of technical toxaphene. PB=Phenobarbital.

\*Significantly different from control value at  $p < 0.05$  (Fisher exact test).

**Supplemental Table S3: Reversibility of GJIC Inhibited by Technical Grade Toxaphene in Male and Female B6C3F1 Mouse Hepatocytes**

|               |             | 2-hour         |                                            | 4-hour         |                                            | 24-hour        |                                            |
|---------------|-------------|----------------|--------------------------------------------|----------------|--------------------------------------------|----------------|--------------------------------------------|
|               |             | Dye Coupling % | % of Control "()"= Difference from Control | Dye Coupling % | % of Control "()"= Difference from Control | Dye Coupling % | % of Control "()"= Difference from Control |
| <b>Male</b>   | DMSO (0.1%) | 94.0           | 100.0                                      | 91.0           | 100.0                                      | 86.2           | 100.0                                      |
|               | PB (2mM)    | 81.4*          | 86.6* (13.4)                               | 80.2*          | 88.1* (11.9)                               | 90.1           | 104.6 (-4.6)                               |
|               | TT+         | 74.0*          | 78.7* (21.3)                               | 78.4*          | 86.2* (13.8)                               | 71.1*          | 82.6* (17.4)                               |
|               | TT-         | 70.2*          | 74.7* (25.3)                               | 77.2*          | 84.9* (15.1)                               | 86.3           | 100.2 (-0.2)                               |
| <b>Female</b> | DMSO (0.1%) | 93.3           | 100.0                                      | 89.4           | 100.0                                      | 89.5           | 100.0                                      |
|               | PB (2mM)    | 73.8*          | 79.1* (20.9)                               | 80.0           | 89.5 (10.5)                                | 87.4           | 97.6 (2.4)                                 |
|               | TT+         | 69.4*          | 74.4* (25.6)                               | 76.3*          | 85.3* (14.7)                               | 71.8*          | 80.2* (19.8)                               |
|               | TT-         | 74.1*          | 79.4* (20.6)                               | 72.2*          | 80.8* (19.2)                               | 84.7           | 94.7 (5.3)                                 |

Cells were exposed to TT at 5 ppm

"TT+" = Samples without TT being removed via fresh Media

"TT-" = Samples with TT removed after 4 hours, washed, and replaced by fresh media

\*Statistically significant compared to control (p<0.05, Fisher's Exact Test)

**Supplemental Table S4: Effect of the p-26 Congener on GJIC in B6C3F1 Mouse Hepatocytes**

|               |              | 3-hour         |                                            | 24-hour        |                                            |
|---------------|--------------|----------------|--------------------------------------------|----------------|--------------------------------------------|
|               |              | Dye Coupling % | % of Control "()"= Difference from Control | Dye Coupling % | % of Control "()"= Difference from Control |
| <b>Male</b>   | p-26 (µg/mL) |                |                                            |                |                                            |
|               | DMSO (0.1%)  | 91.8           | 100.0                                      | 91.5           | 100.0                                      |
|               | PB (2mM)     | 74.8*          | 81.4* (18.6)                               | 90.3           | 98.7 (1.3)                                 |
|               | 2.5 ppm      | 93.4           | 101.7 (-1.7)                               | 90.4           | 98.8 (1.2)                                 |
|               | 5 ppm        | 92.2           | 100.5 (-0.5)                               | 90.4           | 98.8 (1.2)                                 |
|               | 10 ppm       | 92.2           | 100.4 (-0.4)                               | 85.1           | 93.0 (7.0)                                 |
| <b>Female</b> | p-26 (µg/mL) |                |                                            |                |                                            |
|               | DMSO (0.1%)  | 87.6           | 100.0                                      | 92.0           | 100.0                                      |
|               | PB (2mM)     | 69.6*          | 79.4* (20.6)                               | 80.4           | 87.4 (12.6)                                |
|               | 2.5 ppm      | 84.8           | 96.8 (3.2)                                 | 80.4           | 87.5 (12.6)                                |
|               | 5 ppm        | 84.4           | 96.3 (3.7)                                 | 80.2           | 87.2 (12.8)                                |
|               | 10 ppm       | 79.8           | 91.1 (8.9)                                 | 70.7*          | 76.9* (23.1)                               |

Gap junctional intercellular communication inhibition as measured by the dye coupling in B6C3F1 mouse hepatocytes exposed to non-cytotoxic concentrations of the p-26 toxaphene congener.

PB=Phenobarbital.

\*Significantly different from control value at  $p < 0.05$  (Fisher exact test).

**Supplemental Table S5: Effect of the p-50 Congener on GJIC in B6C3F1 Mouse Hepatocytes**

|               |                     | 3-hour         |                                            | 24-hour        |                                            |
|---------------|---------------------|----------------|--------------------------------------------|----------------|--------------------------------------------|
|               |                     | Dye Coupling % | % of Control "()"= Difference from Control | Dye Coupling % | % of Control "()"= Difference from Control |
| <b>Male</b>   | <b>p-50 (µg/mL)</b> |                |                                            |                |                                            |
|               | DMSO (0.1%)         | 91.8           | 100.0                                      | 90.5           | 100.0                                      |
|               | PB (2mM)            | 76.3*          | 83.1* (16.9)                               | 91.3           | 100.9 (-0.9)                               |
|               | 1 ppm               | 88.3           | 96.2 (3.8)                                 | 90.7           | 100.3 (-0.3)                               |
|               | 2.5 ppm             | 84.7           | 92.2 (7.8)                                 | 88.6           | 97.9 (2.1)                                 |
|               | 5 ppm               | 77.5*          | 84.3* (15.7)                               | 81.7*          | 90.3* (9.7)                                |
| <b>Female</b> | <b>p-50 (µg/mL)</b> |                |                                            |                |                                            |
|               | DMSO (0.1%)         | 87.5           | 100.0                                      | 91.1           | 100.0                                      |
|               | PB (2mM)            | 71.8*          | 82.1* (17.9)                               | 79.6           | 87.4 (12.6)                                |
|               | 0.5 ppm             | 86.7           | 99.1 (0.9)                                 | 85.3           | 93.6 (6.4)                                 |
|               | 1 ppm               | 88.7           | 101.3 (-1.3)                               | 80.2           | 88.1 (11.9)                                |
|               | 2.5 ppm             | 80.6           | 92.1 (7.9)                                 | 73.7*          | 80.9* (19.1)                               |

Gap junctional intercellular communication inhibition as measured by the dye coupling in B6C3F1 mouse hepatocytes exposed to non-cytotoxic concentrations of the p-50 toxaphene congener.

PB=Phenobarbital.

\*Significantly different from control value at  $p < 0.05$  (Fisher exact test).

**Supplemental Table S6: Effect of the p-62 Congener on GJIC in B6C3F1 Mouse Hepatocytes**

|               |             | 3-hour         |                                            | 24-hour        |                                            |
|---------------|-------------|----------------|--------------------------------------------|----------------|--------------------------------------------|
|               |             | Dye Coupling % | % of Control "()"= Difference from Control | Dye Coupling % | % of Control "()"= Difference from Control |
| <b>Male</b>   |             |                |                                            |                |                                            |
|               | DMSO (0.1%) | 90.9           | 100.0                                      | 89.4           | 100.0                                      |
|               | PB (2mM)    | 76.5*          | 84.2* (15.8)                               | 90.7           | 101.5 (-1.5)                               |
|               | 1 ppm       | 88.5           | 97.4 (2.6)                                 | 90.7           | 101.4 (-1.4)                               |
|               | 2.5 ppm     | 81.6           | 89.7 (10.3)                                | 84.5           | 94.5 (5.5)                                 |
|               | 5 ppm       | 70.0*          | 77.0* (23.0)                               | 77.3           | 86.5 (13.5)                                |
| <b>Female</b> |             |                |                                            |                |                                            |
|               | DMSO (0.1%) | 86.4           | 100.0                                      | 90.7           | 100.0                                      |
|               | PB (2mM)    | 63.9*          | 73.9* (26.1)                               | 76.0*          | 83.8 (16.2)                                |
|               | 1 ppm       | 88.7           | 102.6 (-2.6)                               | 88.0           | 97.0 (3.0)                                 |
|               | 2.5 ppm     | 87.1           | 100.8 (-0.8)                               | 76.7*          | 84.5* (15.5)                               |
|               | 5 ppm       | 80.4*          | 93.1* (6.9)                                | 70.1*          | 77.3* (22.7)                               |

Gap junctional intercellular communication inhibition as measured by the dye coupling in B6C3F1 mouse hepatocytes exposed to non-cytotoxic concentrations of the p-62 toxaphene congener.

PB=Phenobarbital.

\*Significantly different from control value at  $p < 0.05$  (Fisher exact test).

**Supplemental Table S7: Effect of the Hx-Sed Congener on GJIC in B6C3F1 Mouse Hepatocytes**

|               |             | 3-hour         |                                            | 24-hour        |                                            |
|---------------|-------------|----------------|--------------------------------------------|----------------|--------------------------------------------|
|               |             | Dye Coupling % | % of Control "()"= Difference from Control | Dye Coupling % | % of Control "()"= Difference from Control |
| <b>Male</b>   | DMSO (0.1%) | 94.6           | 100.0                                      | 94.3           | 100.0                                      |
|               | PB (2mM)    | 80.2*          | 84.8* (15.2)                               | 88.7           | 94.0 (6.0)                                 |
|               | 1 ppm       | 95.3           | 100.8 (-0.8)                               | 91.6           | 97.1 (2.9)                                 |
|               | 2 ppm       | 90.5           | 95.6 (4.4)                                 | 88.6           | 93.9 (6.1)                                 |
|               | 5 ppm       | 90.4           | 95.5 (4.5)                                 | 87.4           | 92.6 (7.4)                                 |
|               |             |                |                                            |                |                                            |
| <b>Female</b> | DMSO (0.1%) | 91.9           | 100.0                                      | 93.1           | 100.0                                      |
|               | PB (2mM)    | 71.4*          | 77.7* (22.3)                               | 87.5           | 93.9 (5.9)                                 |
|               | 1 ppm       | 90.1           | 98.0 (2.0)                                 | 83.5           | 89.6 (10.4)                                |
|               | 2.5 ppm     | 85.4           | 93.0 (7.0)                                 | 84.8           | 91.0 (9.0)                                 |
|               | 5 ppm       | 79.2*          | 86.2* (13.8)                               | 69.7*          | 74.8* (25.2)                               |
|               |             |                |                                            |                |                                            |

Gap junctional intercellular communication inhibition as measured by the dye coupling in B6C3F1 mouse hepatocytes exposed to non-cytotoxic concentrations of the Hx-Sed toxaphene congener.

PB=Phenobarbital.

\*Significantly different from control value at  $p < 0.05$  (Fisher exact test).



**Supplemental Table S8: Effect of the Hp-Sed Congener on GJIC in B6C3F1 Mouse Hepatocytes**

|               |             | 3-hour         |                                            | 24-hour        |                                            |
|---------------|-------------|----------------|--------------------------------------------|----------------|--------------------------------------------|
|               |             | Dye Coupling % | % of Control "()"= Difference from Control | Dye Coupling % | % of Control "()"= Difference from Control |
| <b>Male</b>   | DMSO (0.1%) | 94.4           | 100.0                                      | 93.2           | 100.0                                      |
|               | PB (2mM)    | 83.0*          | 87.9* (12.1)                               | 92.2           | 99.0 (1.0)                                 |
|               | 10 ppm      | 96.2           | 101.8 (-1.8)                               | 85.6           | 91.8 (8.2)                                 |
|               | 15 ppm      | 88.5           | 93.7 (6.3)                                 | 84.8           | 90.9 (9.1)                                 |
|               | 25 ppm      | 82.2*          | 87.0* (13.0)                               | 77.7*          | 83.3* (16.7)                               |
| <b>Female</b> | DMSO (0.1%) | 95.6           | 100.0                                      | 95.3           | 100.0                                      |
|               | PB (2mM)    | 78.9*          | 82.5* (17.5)                               | 92.5           | 97.0 (3.0)                                 |
|               | 10 ppm      | 93.4           | 97.7 (2.3)                                 | 89.5           | 94.0 (6.0)                                 |
|               | 15 ppm      | 86.8           | 90.8 (9.2)                                 | 84.8*          | 89.0* (11.0)                               |
|               | 25 ppm      | 78.9*          | 82.5* (17.5)                               | 75.0*          | 78.7* (21.3)                               |

Gap junctional intercellular communication inhibition as measured by the dye coupling in B6C3F1 mouse hepatocytes exposed to non-cytotoxic concentrations of the Hp-Sed toxaphene congener.

PB=Phenobarbital.

\*Significantly different from control value at  $p < 0.05$  (Fisher exact test).

**Supplemental Table S9: Effect of Congener Mix 1 (p-26 + p-50 + p-62) on GJIC in B6C3F1 Mouse Hepatocytes**

|               |                                              | 3-hour         |                                            | 24-hour        |                                            |
|---------------|----------------------------------------------|----------------|--------------------------------------------|----------------|--------------------------------------------|
|               |                                              | Dye Coupling % | % of Control "()"= Difference from Control | Dye Coupling % | % of Control "()"= Difference from Control |
| <b>Male</b>   | <b>Mixture 1 (% mix in DMSO)<sup>a</sup></b> |                |                                            |                |                                            |
|               | DMSO (0.1%)                                  | 94.4           | 100.0                                      | 93.2           | 100.0                                      |
|               | PB (2mM)                                     | 83.0*          | 87.9* (12.1)                               | 92.2           | 99.0 (1.0)                                 |
|               | 5 ppm                                        | 91.6           | 97.0 (3.0)                                 | 91.6           | 98.3 (1.7)                                 |
|               | 10 ppm                                       | 93.3           | 98.8 (1.2)                                 | 87.5           | 93.9 (6.1)                                 |
|               | 25 ppm                                       | 87.9           | 93.0 (7.0)                                 | 86.0           | 92.3 (7.7)                                 |
| <b>Female</b> | <b>Mixture 1 (% mix in DMSO)</b>             |                |                                            |                |                                            |
|               | DMSO (0.1%)                                  | 95.6           | 100.0                                      | 95.3           | 100.0                                      |
|               | PB (2mM)                                     | 78.9*          | 82.5* (17.5)                               | 92.5           | 97.0 (3.0)                                 |
|               | 5 ppm                                        | 95.2           | 99.6 (0.4)                                 | 93.5           | 98.1 (1.9)                                 |
|               | 10 ppm                                       | 92.3           | 96.5 (3.5)                                 | 85.3           | 89.5 (10.5)                                |
|               | 25 ppm                                       | 88.8           | 92.9 (7.1)                                 | 77.5*          | 81.3* (18.7)                               |
|               | 50 ppm                                       | 85.7           | 89.6 (10.4)                                | 76.5*          | 80.3* (19.7)                               |
|               | 100 ppm                                      | 75.7*          | 79.2* (20.8)                               | 66.0*          | 69.3* (30.7)                               |

Gap junctional intercellular communication inhibition as measured by the dye coupling in B6C3F1 mouse hepatocytes exposed to non-cytotoxic concentrations of the toxaphene congener Mix 1.

PB=Phenobarbital.

\*Significantly different from control value at  $p < 0.05$  (Fisher exact test).

<sup>a</sup> % represents the fraction of each congener present in the mixture based on the concentrations for each congener shown in Table 1.

**Supplemental Table S10: Effect of Congener Mix 2 (p-26 + p-60 + p-62 + Hx-Sed) on GJIC in B6C3F1 Mouse Hepatocytes**

|               |                                              | 3-hour         |                                            | 24-hour        |                                            |
|---------------|----------------------------------------------|----------------|--------------------------------------------|----------------|--------------------------------------------|
|               |                                              | Dye Coupling % | % of Control "()"= Difference from Control | Dye Coupling % | % of Control "()"= Difference from Control |
| <b>Male</b>   | <b>Mixture 2 (% mix in DMSO)<sup>a</sup></b> |                |                                            |                |                                            |
|               | DMSO (0.1%)                                  | 94.4           | 100.0                                      | 93.2           | 100.0                                      |
|               | PB (2mM)                                     | 83.0*          | 87.9* (12.1)                               | 92.2           | 99.0 (1.0)                                 |
|               | 5 ppm                                        | 94.3           | 99.8 (0.2)                                 | 90.8           | 97.4 (2.6)                                 |
|               | 10 ppm                                       | 87.6           | 92.8 (7.2)                                 | 88.3           | 94.7 (5.3)                                 |
|               | 25 ppm                                       | 84.2           | 89.1 (10.9)                                | 78.0*          | 83.7* (16.3)                               |
| <b>Female</b> | <b>Mixture 2 (% mix in DMSO)</b>             |                |                                            |                |                                            |
|               | DMSO (0.1%)                                  | 95.6           | 100.0                                      | 95.3           | 100.0                                      |
|               | PB (2mM)                                     | 78.9*          | 82.5* (17.5)                               | 92.5           | 97.0 (3.0)                                 |
|               | 5 ppm                                        | 92.5           | 96.7 (3.3)                                 | 91.4           | 96.0 (4.0)                                 |
|               | 10 ppm                                       | 92.2           | 96.5 (3.5)                                 | 85.8           | 90.1 (9.9)                                 |
|               | 25 ppm                                       | 85.7           | 89.6 (10.4)                                | 76.4*          | 80.2* (19.8)                               |
|               | 50 ppm                                       | 79.6*          | 83.3* (16.7)                               | 74.0*          | 77.7* (22.3)                               |
|               | 100 ppm                                      | 72.8*          | 76.2* (23.8)                               | 68.3*          | 71.6* (28.4)                               |

Gap junctional intercellular communication inhibition as measured by the dye coupling in B6C3F1 mouse hepatocytes exposed to non-cytotoxic concentrations of the toxaphene congener Mix 2.

PB=Phenobarbital.

\*Significantly different from control value at  $p < 0.05$  (Fisher exact test).

<sup>a</sup> % represents the fraction of each congener present in the mixture based on the concentrations for each congener shown in Table 1.

**Supplemental Table S11. Modeled Effect of Technical Toxaphene and Toxaphene Congeners on Cytotoxicity in Male and Female B6C3F1 Hepatocytes after 24 Hours of Exposure**

| Congener <sup>a</sup> | Sex | df             | R <sup>2</sup> | EC50 (ppm) | SE (ppm) | EC20 (ppm)        | SE (ppm) |
|-----------------------|-----|----------------|----------------|------------|----------|-------------------|----------|
| TT                    | M   | 8 <sup>b</sup> | 0.978          | 45.3       | 1.49     | 9.99              | 0.547    |
| TT                    | F   | 9              | 0.983          | 20.5       | 1.97     | 8.97              | 0.774    |
| p-26                  | M   | 5              | 0.826          | 39.5       | 4.07     | 18.7              | 1.52     |
| p-26                  | F   | 5              | 0.629          | 75.3       | 13.0     | 16.1              | 1.14     |
| p-50                  | M   | 5              | 0.760          | 45.8       | 4.04     | 20.4              | 1.29     |
| p-50                  | F   | 5              | 0.683          | 58.4       | 10.7     | 19.1              | 1.73     |
| p-62                  | M   | 5              | 0.917          | 32.5       | 5.16     | 10.3              | 1.21     |
| p-62                  | F   | 5              | 0.800          | 46.8       | 4.18     | 8.30              | 0.470    |
| Hx-Sed                | M   | 5              | 0.696          | 49.3       | 10.1     | 6.64 <sup>c</sup> | 0.710    |
| Hx-Sed                | F   | 5              | 0.608          | 87.1       | 22.5     | 14.7              | 1.33     |
| Hp-Sed                | M   | 5              | 0.777          | 38.9       | 2.19     | 29.3              | 1.75     |
| Hp-Sed                | F   | 5              | 0.603          | 49.2       | 5.04     | 31.5              | 3.00     |
| Mix 1 <sup>d</sup>    | M   | 5              | 0.250          | 87.3       | 28.1     | 44.1              | 8.01     |
| Mix 1                 | F   | 5              | NS             | —          | —        | —                 | —        |
| Mix 2                 | M   | 5              | 0.636          | 81.1       | 37.8     | 12.8              | 2.49     |
| Mix 2                 | F   | 5              | NS             | —          | —        | —                 | —        |

<sup>a</sup> Congener concentrations in Mixtures 1 & 2 defined in Table 1. Exposure duration = 24 hours. df = degrees of freedom. R<sup>2</sup> = coefficient of determination = fraction of response variance explained by lognormal regression model. NS = response did not differ significantly (p > 0.05) by Fisher exact test from that of unexposed cells tested at any concentration. EC50 (or EC20) = benchmark concentration in ppm at which a 50% (or 20%) relative decline in B6C3F1 mouse hepatocyte viability is predicted by the fitted model. SE = standard error of estimate in column to the left of same row.

<sup>b</sup> Response at highest dose deleted as outlier using an F-test.

<sup>c</sup> Significantly less than male TT EC20, by 2-tail t-test (p < 10<sup>-6</sup>).

<sup>d</sup> If more refined data on Mix 1 and 2 concentrations used in the assay become available, modeling of the EC50 and E20 will be performed.
